# Supplementary material for: In Vivo Transfer and Microevolution of Avian Native IncA/C2 blaNDM-1-Carrying Plasmid pRH-1238 during a Broiler Chicken Infection Study
Source: PubMed Central journal article supplement (PMC5913973; doi:10.1128/aac.02128-17), 2018-03-27
Supplement: AAC.02128-17_zac004187054s1.pdf [file AAC.02128-17_zac004187054s1.pdf]

1 TABLE S1. Phenotypic and genotypic properties of challenge strains

|                  | Challenge strains                                      | Origin/<br>Year of<br>isolation                     | Plasmids             | Phenotypic<br>resistance profile<br>(by MIC) <sup>a</sup>     | Genotypic<br>resistance profile of<br>pRH-1238                                                                                                                                                                                                                                  | Genotypic<br>resistance of others | Reference |
|------------------|--------------------------------------------------------|-----------------------------------------------------|----------------------|---------------------------------------------------------------|---------------------------------------------------------------------------------------------------------------------------------------------------------------------------------------------------------------------------------------------------------------------------------|-----------------------------------|-----------|
| <b>Donor</b>     | NDM-1 producing<br><i>S. Corvallis</i><br>(12-SA01738) | Black kite<br>( <i>Milvus<br/>migrans</i> )<br>2012 | IncHI2<br>(~310 kb)  | AMP, CHL, CIP,<br>FFN, FOT, KAN<br>SMX, STR, TAZ,<br>TET, TMP | <i>bla</i> <sub>CMY-16</sub> , <i>bla</i> <sub>NDM-1</sub> ,<br><i>floR</i> , <i>accA4</i> [ <i>aac</i> (6')-<br><i>lb</i> ], <i>tet</i> (A),<br><i>drfA1/7/17</i> , <i>strA/B</i> ,<br><i>sul1</i> , <i>sul2</i> , <i>aadA5</i> ,<br><i>fosA3</i> , <i>aphA6</i> , <i>mphA</i> | <i>qnrS</i>                       | (1, 2)    |
|                  |                                                        |                                                     | ColRNAI<br>(< 20 kb) |                                                               |                                                                                                                                                                                                                                                                                 |                                   |           |
| <b>Recipient</b> | <i>S. Paratyphi B</i><br>( <i>dTa</i> +) (13-SA01617)  | Chicken<br>meat<br>2013                             | none                 | CIP, NAL,<br>STR, TMP                                         | -                                                                                                                                                                                                                                                                               | <i>aadA1</i> , <i>dfrA1</i>       | -         |

<sup>a</sup> MIC carried out following CLSI guidelines, CLSI M07-A9 and using EUCAST epidemiological cut-off values (<http://www.eucast.org>)

Definition of abbreviations:

AMP (Ampicillin), CHL (Chloramphenicol), CIP (Ciprofloxacin), NAL (Nalidixic acid), FFN (Florfenicol), FOT (Cephotaxime),

KAN (Kanamycin), SMX (Sulphamethoxazole), STR (Streptomycin), TAZ (Cephtazidime), TET (Tetracycline), TMP (Trimethoprim)

3 TABLE S2. Average CTF rates based on filter mating conjugation experiments for donor and recipient strains

4

| Donor                                           | Recipients                                                       | Strain no. | Conjugation transfer frequency (CTF) rate |                       |                       |
|-------------------------------------------------|------------------------------------------------------------------|------------|-------------------------------------------|-----------------------|-----------------------|
|                                                 |                                                                  |            | RT                                        | 37°C                  | 42°C                  |
| NDM-1 producing<br>S. Corvallis<br>(12-SA01738) | S. Enteritidis<br>[with 60 kb <i>pSEV</i> virulence plasmid (3)] | 07-SA03428 | $5,08 \times 10^{-5}$                     | $8,71 \times 10^{-3}$ | $1,88 \times 10^{-2}$ |
|                                                 | S. Enteritidis<br>(without 60 kb <i>pSEV</i> virulence plasmid)  | 04-SA02117 | $8,56 \times 10^{-5}$                     | $1,50 \times 10^{-2}$ | $1,57 \times 10^{-2}$ |
|                                                 | S. Infantis                                                      | 14-SA03263 | $6,64 \times 10^{-5}$                     | $9,04 \times 10^{-3}$ | $1,10 \times 10^{-2}$ |
|                                                 | S. Paratyphi B ( <i>dTa+</i> )                                   | 13-SA01617 | $3,50 \times 10^{-4}$                     | $8,07 \times 10^{-3}$ | $1,06 \times 10^{-2}$ |

5

6 TABLE S3. Antibiotic supplementation of selective plates for target microorganisms

7

| Target microorganisms                                   | Medium                 | Antibiotic supplementation |                           |                             |
|---------------------------------------------------------|------------------------|----------------------------|---------------------------|-----------------------------|
|                                                         |                        | Cefotaxime<br>(1 mg/l)     | Meropenem<br>(0.125 mg/l) | Nalidixic acid<br>(50 mg/l) |
| S. Corvallis                                            | XLD agar               | +                          | +                         | -                           |
| S. Paratyphi B (dTa+)                                   | XLD agar               | -                          | -                         | +                           |
| NDM-1-producing<br>S. Paratyphi B (dTa+)                | XLD agar               | +                          | +                         | +                           |
| Carbapenemase-<br>producing<br>Enterobacteriaceae (CPE) | chromID®<br>CARBA agar | unknown                    | unknown                   | unknown                     |

8

9

10

11

12

13

14

15

16

17

18

19

20

21

22

23

24

25

26

27

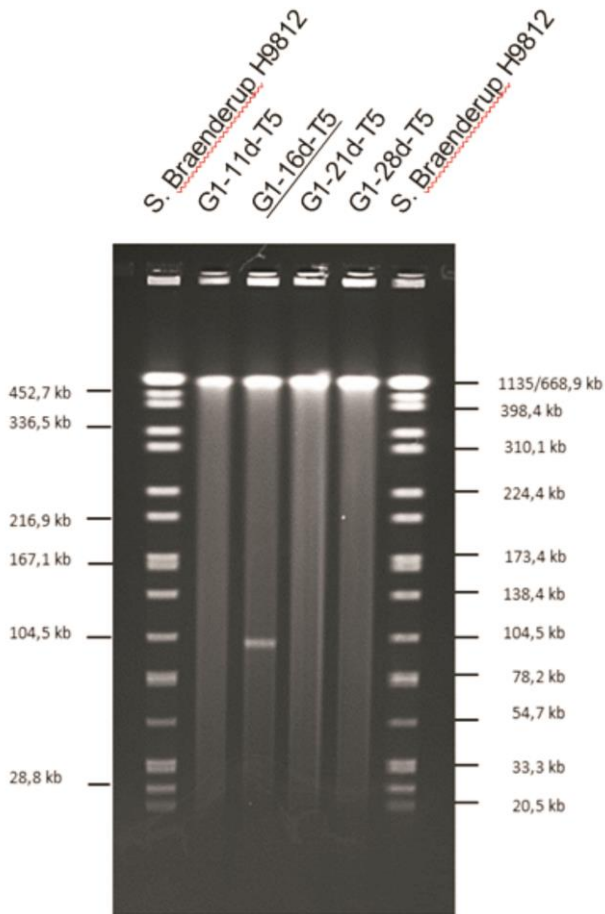

28  
29  
30  
31  
32  
33  
34  
35  
36  
37  
38  
39  
40  
41

**FIGURE S1.** S1-PFGE analysis of *S. Paratyphi B* (*dTa+*) reisolates from Group 1 in lanes 2-5 with molecular-sized standard, *Salmonella* Braenderup strain H9812 (restricted with XbaI) in lanes 1 and 6. Underlined strain selected for WGS.

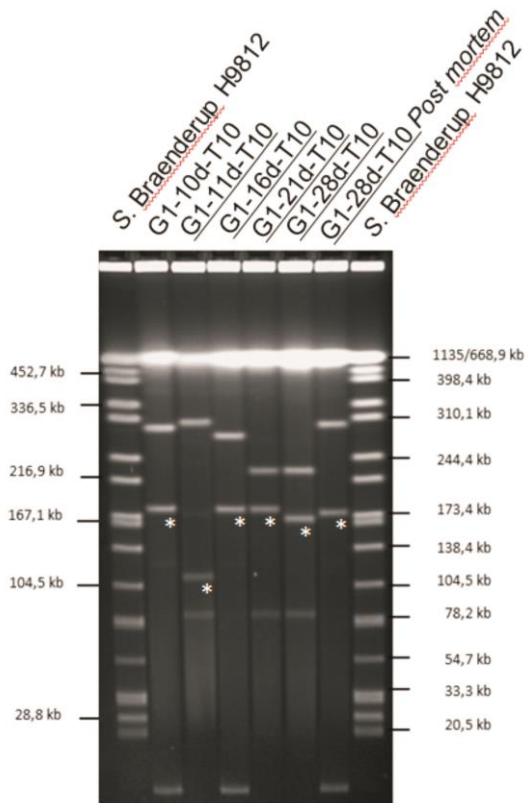

42

43

44

45 **FIGURE S2.** S1-PFGE analysis of *S. Corvallis* reisolates from Group 1 in lanes 2-7 with  
 46 molecular-sized standard, *Salmonella* Braenderup strain H9812 (restricted with XbaI) in  
 47 lanes 1 and 8. Asterix (\*) marked *bla*<sub>NDM-1</sub> hybridisation. Underlined strains selected for WGS.

48

49

50

51

52

53

54

55

56

57

58

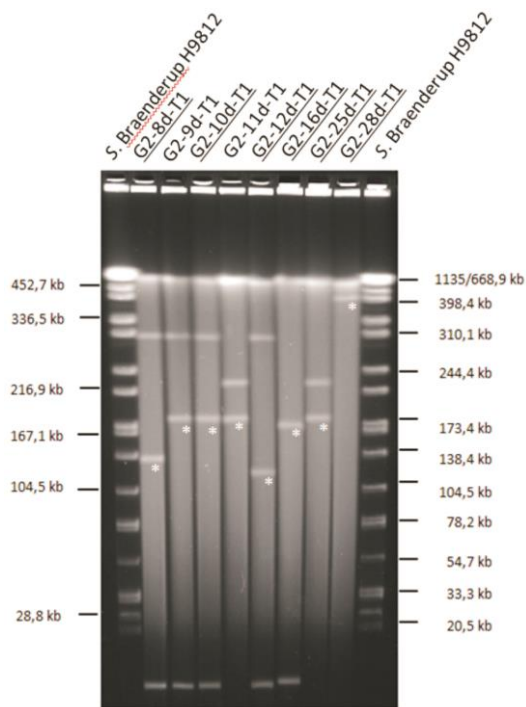

60

61

62 **FIGURE S3.** S1-PFGE analysis of *S. Corvallis* reisolates from Group 2 in lanes 2-9 with  
 63 molecular-sized standard, *Salmonella* Braenderup strain H9812 (restricted with XbaI) in  
 64 lanes 1 and 10. Asterix (\*) marked  $bla_{NDM-1}$  hybridisation. Underlined strains selected for  
 65 WGS.

66

67

68

69

70

71

72

73

74

75

76

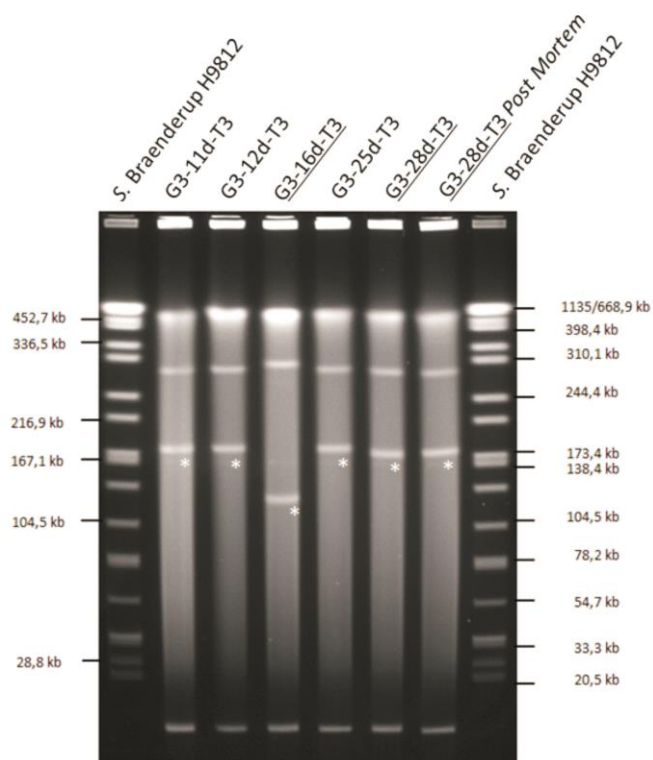

77

78

79 **FIGURE S4.** S1-PFGE analysis of *S. Corvallis* reisolates from Group 3 in lanes 2-7 with  
 80 molecular-sized standard, *Salmonella* Braenderup strain H9812 (restricted with XbaI) in  
 81 lanes 1 and 8. Asterix (\*) marked *bla*<sub>NDM-1</sub> hybridisation. Underlined strains selected for WGS.

82

83

84

85

86

87

88

89

90

91

92

93

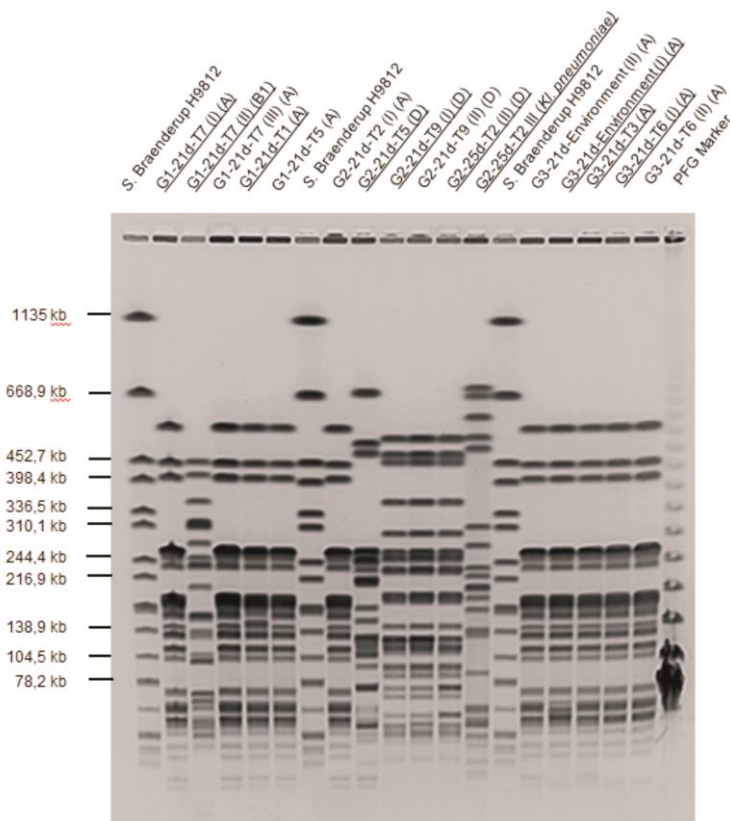

95

96

97 **FIGURE S5.** XbaI-PFGE analysis of NDM-1 producing Enterobacteriaceae transconjugants  
 98 from Group 1 (lanes 2-6), Group 2 (lanes 8-13), Group 3 (lanes 15-19) with *E. coli* phylogroups (A,  
 99 B1 and D) designation in brackets and one *K. pneumoniae* strain. Molecular-sized standard  
 100 *Salmonella* Braenderup strain H9812 (restricted with XbaI) in lanes 1, 7, 14 and MidRange  
 101 PFG Marker in lane 20. Underlined strains selected for WGS.

102

103

104

105

106

107

108



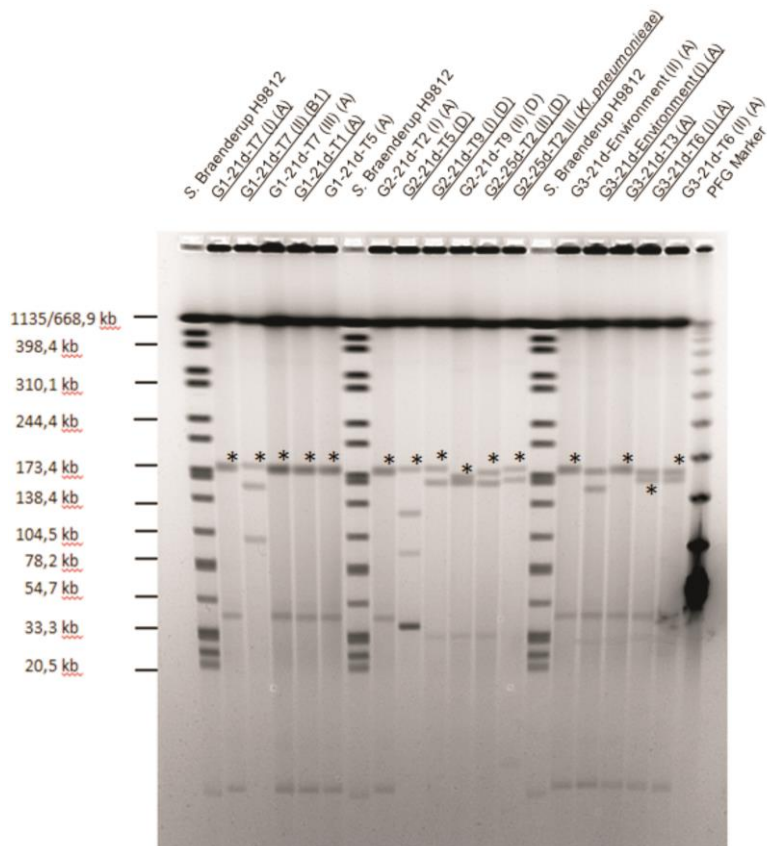

109

110

111 **FIGURE S6.** S1-PFGE analysis analysis of NDM-1 producing Enterobacteriaceae  
 112 transconjugants from Group 1 (lanes 2-6), Group 2 (lanes 8-13), Group 3 (15-19) with *E. coli*  
 113 phylogroups (A, B1 and D) designation in brackets and one *K. pneumoniae* strain. Molecular-  
 114 sized standard *Salmonella* Braenderup strain H9812 (restricted with XbaI) in lanes 1, 7, 14  
 115 and MidRange PFG Marker in lane 20. Asterix (\*) marked *bla*<sub>NDM-1</sub> hybridisation. Underlined  
 116 strains selected for WGS.

117

118

119

120

121

122

123

124

125 **References**

126

- 127 1. Fischer J, Schmoger S, Jahn S, Helmuth R, Guerra B. 2013. NDM-1 carbapenemase-producing  
128 *Salmonella enterica* subsp. *enterica* serovar *Corvallis* isolated from a wild bird in Germany. *J*  
129 *Antimicrob Chemother* 68:2954-6.
- 130 2. Villa L, Guerra B, Schmoger S, Fischer J, Helmuth R, Zong Z, Garcia-Fernandez A, Carattoli A.  
131 2015. InCA/C Plasmid Carrying blaNDM-1, blaCMY-16, and fosA3 in a *Salmonella enterica*  
132 Serovar *Corvallis* Strain Isolated from a Migratory Wild Bird in Germany. *Antimicrob Agents*  
133 *Chemother* 59:6597-600.
- 134 3. Nakamura M, Sato S, Ohya T, Suzuki S, Ikeda S. 1985. Possible relationship of a 36-  
135 megadalton *Salmonella enteritidis* plasmid to virulence in mice. *Infect Immun* 47:831-3.

136
